# Supplementary material
Source: PubMed Central journal article supplement (PMC7400732)
Supplement: NIHMS1609589-supplement-Supplementary_Fig__1.pdf [file NIHMS1609589-supplement-Supplementary_Fig__1.pdf]

**Fig. S1**

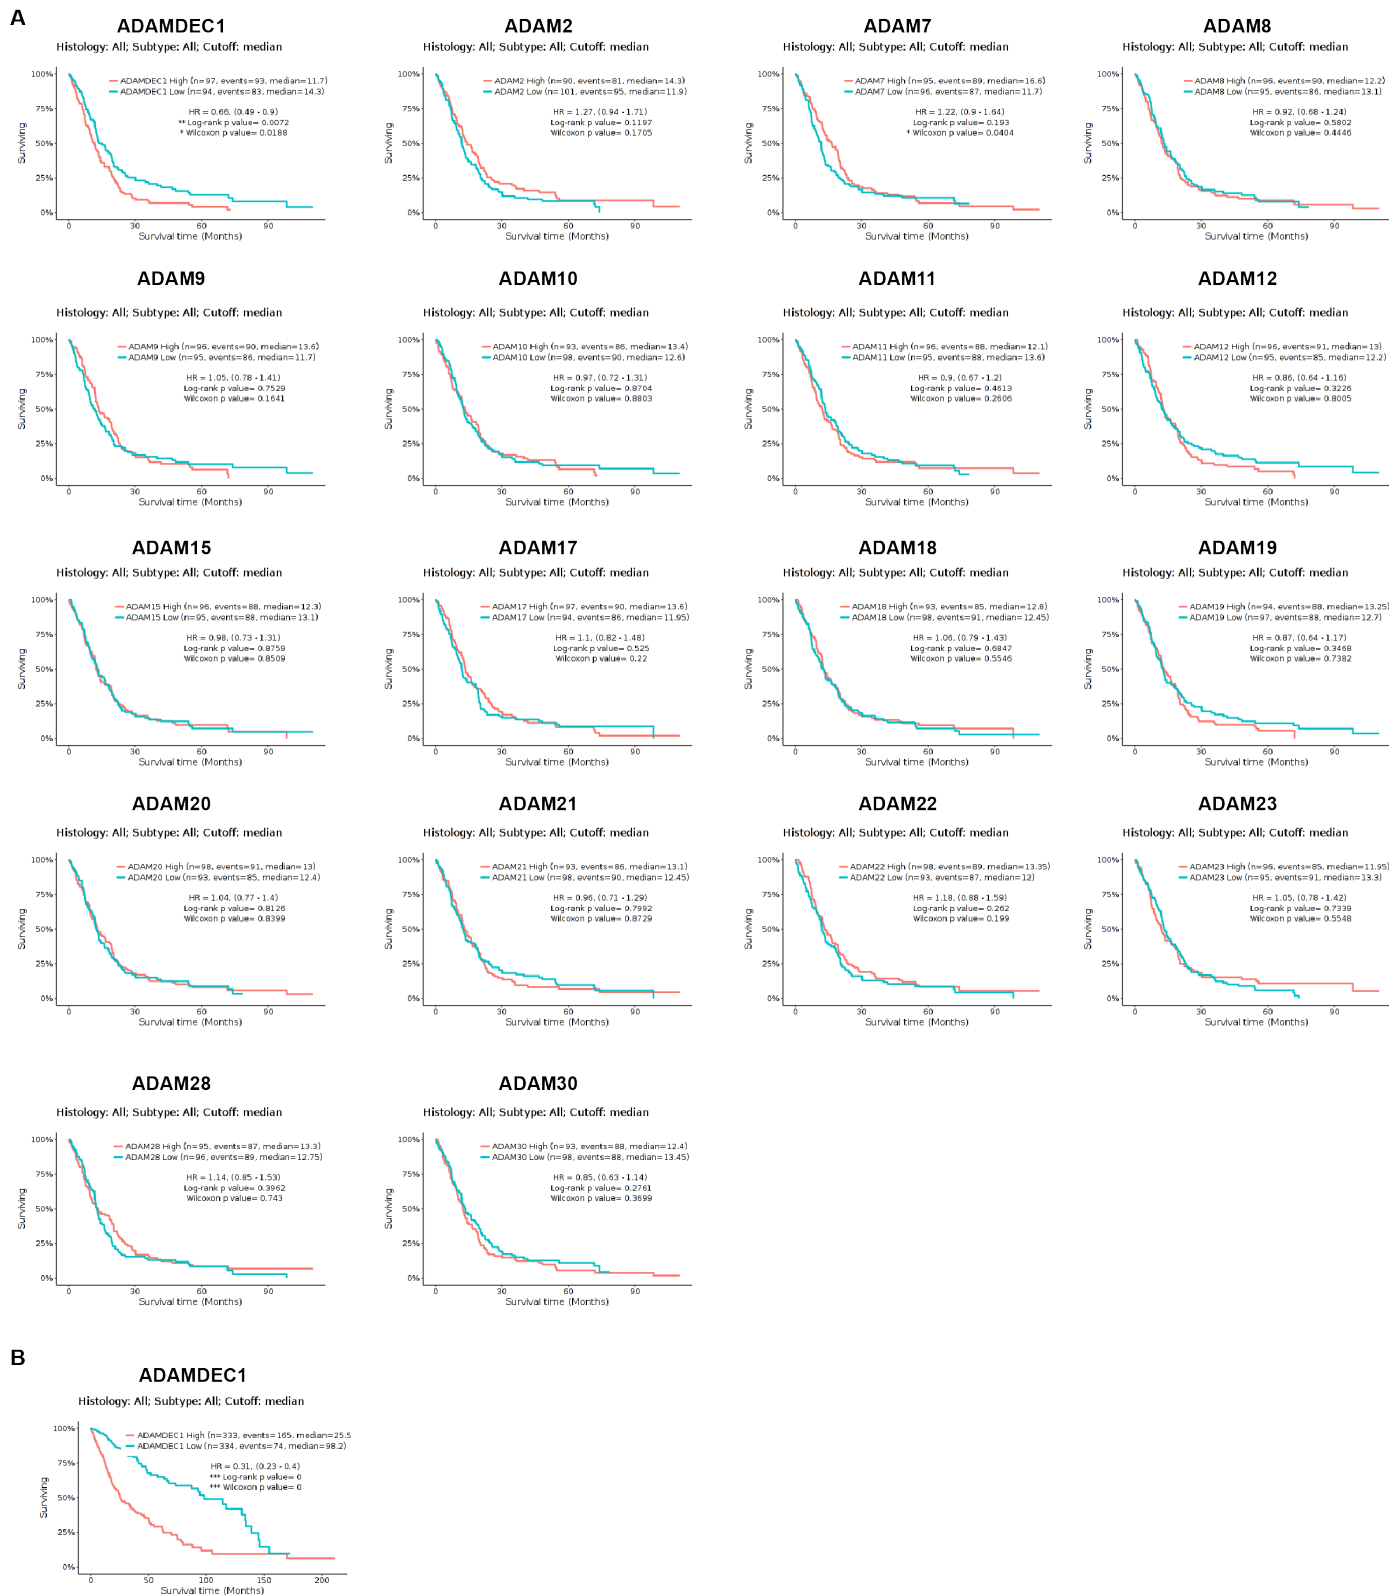

**Fig. S1: (A)** Kaplan-Meier analysis of GBM patient survival after stratification for ADAM family members in the LeeY dataset. **(B)** Kaplan-Meier analysis of patient survival (combined high-grade and low-grade glioma) after stratification for ADAMDEC1 in the TCGA Glioma dataset.
