# Supplementary material
Source: PubMed Central journal article supplement (PMC7400732)
Supplement: NIHMS1609589-supplement-Supplementary_Fig__2.pdf [file NIHMS1609589-supplement-Supplementary_Fig__2.pdf]

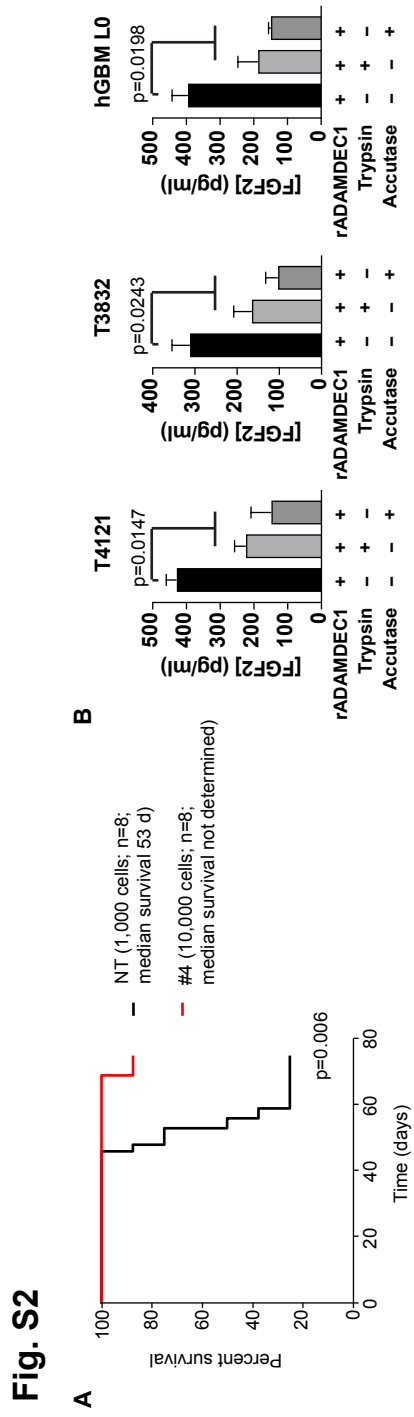

**Fig. S2: (A)** Kaplan-Meier analysis of animals xenografted with control (NT) or ADAMDEC1 knockdown (#4) cells shows that loss of ADAMDEC1 increases animal survival irrespective of the number of implanted cells. **(B)** Pretreatment of GBM cells with Trypsin or Accutase prevents FGF2 release upon exposure to rADAMDEC1 (one-way ANOVA).
