# Supplementary material
Source: PubMed Central journal article supplement (PMC7400732)
Supplement: NIHMS1609589-supplement-Supplementary_Fig__3.pdf [file NIHMS1609589-supplement-Supplementary_Fig__3.pdf]

**Fig. S3**

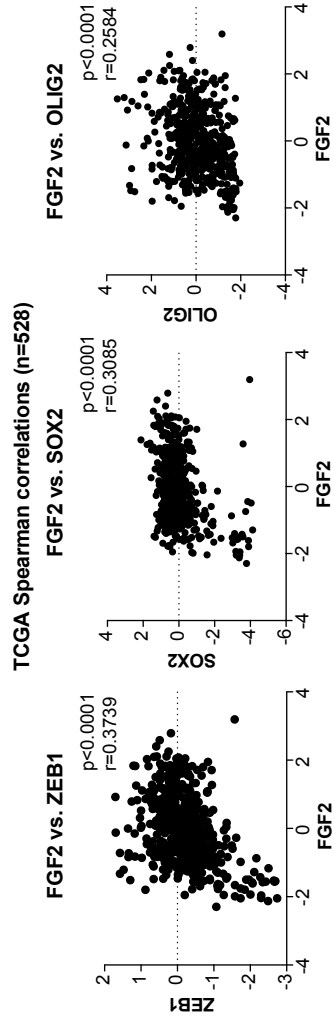

**Fig. S3:** Spearman correlations of FGF2 and ZEB1 (left), SOX2 (middle) and OLIG2 (right) in the TCGA dataset, based on expression z-scores.
