# Supplementary material
Source: PubMed Central journal article supplement (PMC7400732)
Supplement: NIHMS1609589-supplement-Supplementary_Fig__4.pdf [file NIHMS1609589-supplement-Supplementary_Fig__4.pdf]

**Fig. S4**

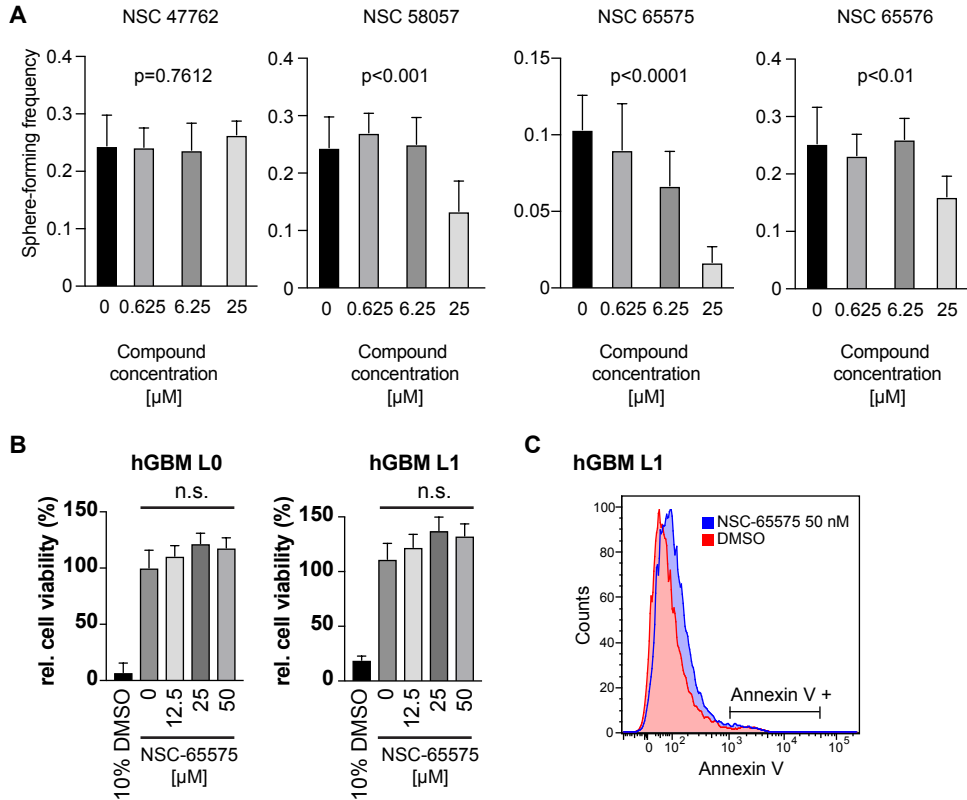

**Fig. S4:** (A) Sphere-forming assay using three compounds that have been shown to block binding FGF2 to its receptors. Bar graphs show sphere-forming frequency relative to vehicle control (DMSO). NSC 65575 was the only compound effective in this assay and was tested in subsequent colony-forming assays. (B) MTT assay shows that NSC 65575 does not affect cell viability across the range of concentrations tested in other experimental paradigms. 10% DMSO was used as positive control and strongly decreased viability. (C) Annexin V staining demonstrates that NSC 65575 does not increase apoptosis, even at the highest concentration tested.
