# Supplementary material
Source: PubMed Central journal article supplement (PMC7400732)
Supplement: NIHMS1609589-supplement-Supplementary_Fig__5.pdf [file NIHMS1609589-supplement-Supplementary_Fig__5.pdf]

**Fig. S5**

**GSEA: Verhaak Glioblastoma Gene Sets (separate cluster vs all samples)**

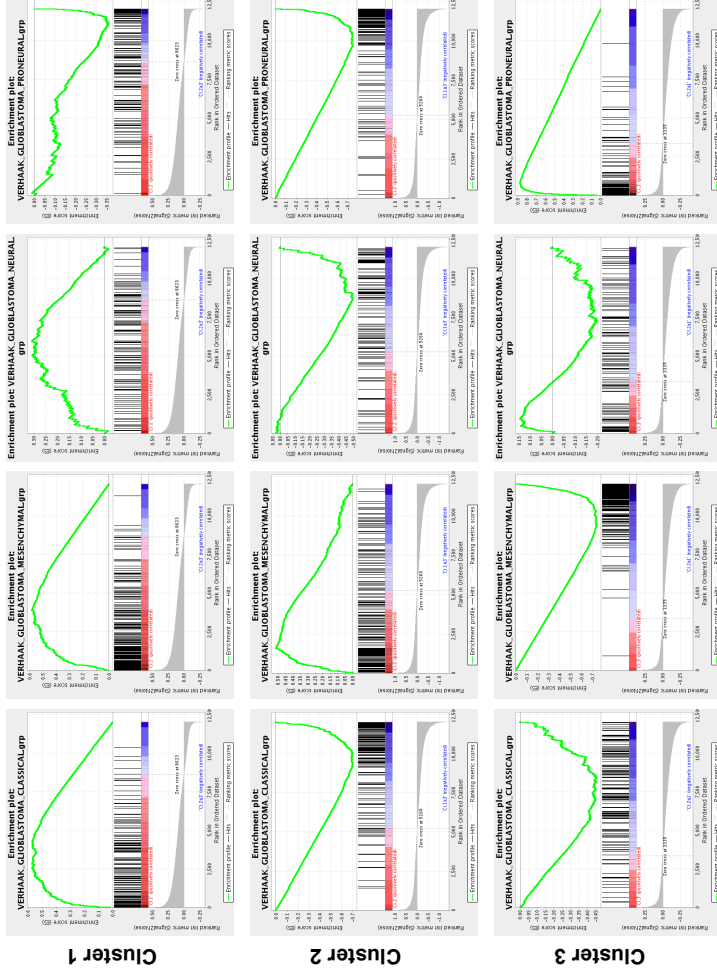

**Fig. S5:** Gene-set enrichment analysis for clusters 1-3 from hierarchical cluster analysis of TCGA data in Fig. 3, using molecular subclasses as defined by Verhaak et al. 2010 (4).
